# Supplementary material
Source: publisher figshare collection journal article supplement (https://sage.figshare.com/ndownloader/files/15611900)

The supplementary materials consist of 3 supplementary tables and 4 supplementary figures.

### Supplementary Tables

**Supplementary Table 1.** Expression and scoring of HIF2A in NSCLC tissues.

| Intensity<br>Positive Cell (%) | Weak Staining<br>= 1 point | Medium Staining<br>= 2 points | Strong Staining<br>= 3 points |
|--------------------------------|----------------------------|-------------------------------|-------------------------------|
| <10% = 1 point                 | IRS = 1                    | IRS = 2                       | IRS = 3                       |
| 10%-<50%<br>= 2 points         | IRS = 2                    | IRS = 4                       | IRS = 6                       |
| 50%-<80%<br>= 3 points         | IRS = 3                    | IRS = 6                       | IRS = 9                       |
| ≥ 80% = 4 points               | IRS = 4                    | IRS = 8                       | IRS = 12                      |

**Supplementary Table 2.** Primers for shRNA construction

| shRNA   | Forward                                                                      | Reverse                                                                        | Target Seq                          |
|---------|------------------------------------------------------------------------------|--------------------------------------------------------------------------------|-------------------------------------|
| shFOXP3 | 5'-<br>CCGGCTGAGTCTGCACAAGTGCT<br>TTCTCGAGAAAGCACTTGTGCAG<br>ACTCAGTTTTTG-3' | 5'-<br>AATTCAAAAAGTCTGAGTCTGCAC<br>AAGTGCTTTCTCGAGAAAGCAC<br>TTGTGCAGACTCAG-3' | 5'-<br>CTGAGTCTGCACA<br>AGTGCTTT-3' |
| shHIF2A | 5'-<br>CCGGGCGCAAATGTACCCAATGA<br>TACTCGAGTATCATTGGGTACATT<br>TGCCTTTTTG-3'  | 5'-<br>AATTCAAAAAGCGCAAATGTAC<br>CCAATGATACTCGAGTATCATT<br>GGGTACATTTGCGC-3'   | 5'-<br>GCGCAAATGTAC<br>CCAATGATA-3' |

**Supplementary Table 3.** Primers for real-time PCR.

| Item           | Forward                        | Reverse                        |
|----------------|--------------------------------|--------------------------------|
| EGFR-AS1       | 5'-AGGACTGACTGCCACTGCTAACC-3'  | 5'-GAATACGCCGTTGCCCCGTCATCT-3' |
| HIF2A          | 5'-GCTTCCTGCGAACACACAAG-3'     | 5'-GGTCACCACGGCAATGAAAC-3'     |
| FOXP3          | 5'-CCTACCCACTGCTGGCAAAT-3'     | 5'-CCTGGCAGTGCTTGAGGAA-3'      |
| GAPDH          | 5'-GCACCACCAACTGCTTAGCA-3'     | 5'-TCTTCTGGGTGGCAGTGATG-3'     |
| HIF2A_CHIP-PCR | 5'-AAAGCTTGCGGATTTCAGAGCCAG-3' | 5'-AAGTGATCATGTTCAATCCTCACG3'  |

## Supplementary Figures

**Supplementary Figure 1.** The expression of HIF2A in NSCLC patients. The expression of HIF2A in paired patient tissues was evaluated by IHC. The experiments were performed in triplicate at least.

Supplementary Figure 1

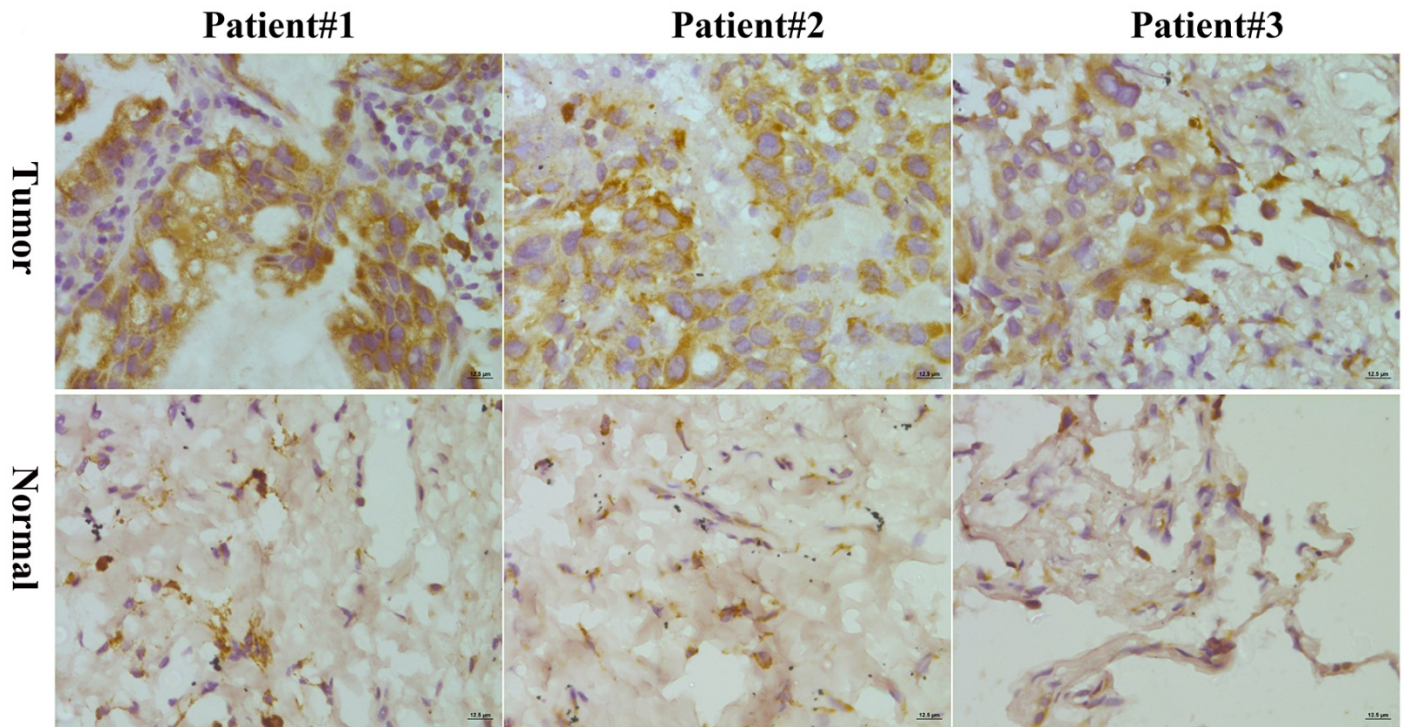

**Supplementary Figure 2.** TUNEL analysis for transfected cell lines. TUNEL analysis was conducted to evaluate the apoptosis of the cell lines with EGFR-AS1, HIF2A, FOXP3 or scramble respectively (\*\*P<0.01, \*P<0.05). The experiments were performed in triplicate at least. The experiments were performed in triplicate at least.

Supplementary Figure 2

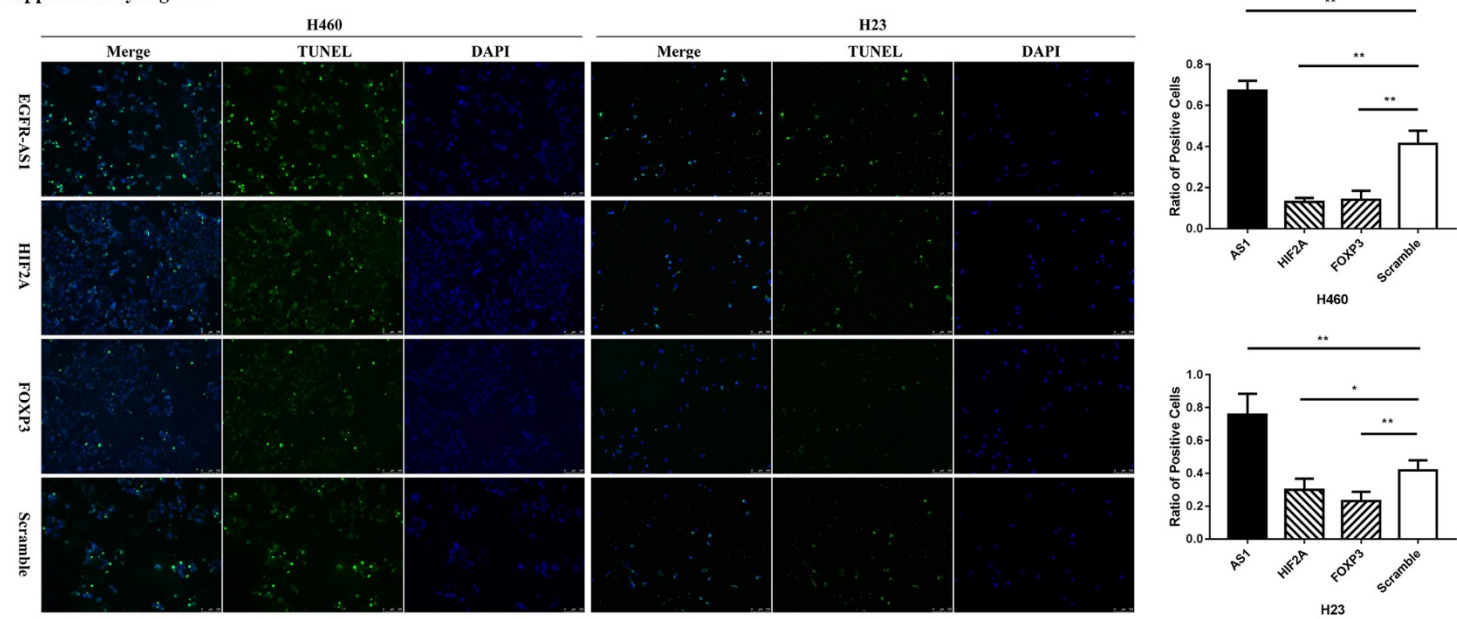

**Supplementary Figure 3.** The influence of EGFR-AS1 upon FOXP3 expression and NSCLC cells stemness in vivo. (a) H460 cells stably transfected with scramble or EGFR-AS1 were respectively injected subcutaneously into nude mice. (b) The volumes of the tumours were measured every 3 days (\* $p < 0.05$ ). (c) WB analysis was conducted to evaluate the expression of HIF2A, FOXP3 and two CSC markers. (d) IHC analysis was conducted to evaluate the expression of HIF2A, FOXP3 and two CSC markers. The experiments were performed in triplicate at least.

**Supplementary Figure 3**

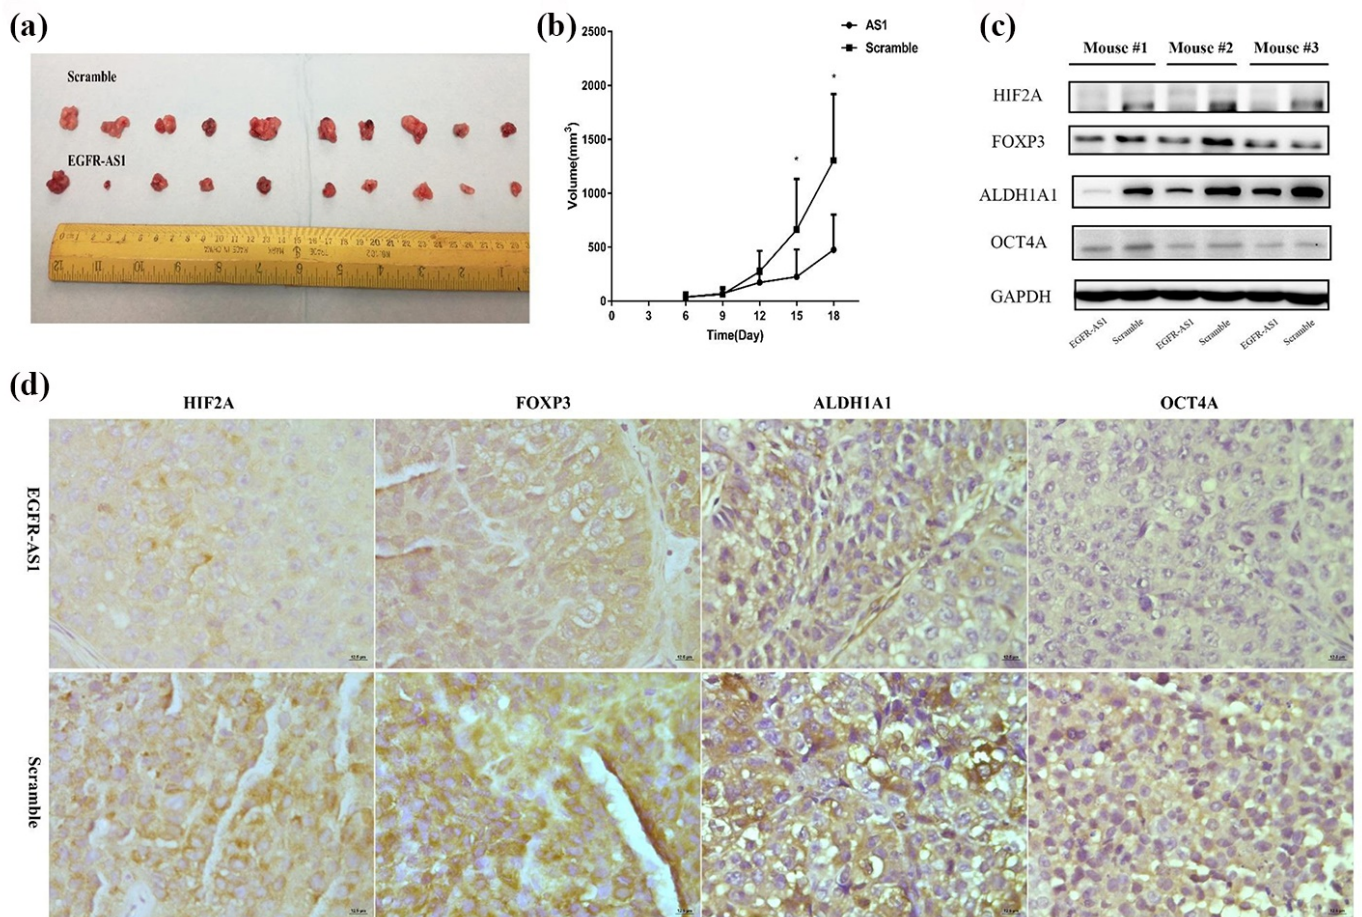



**Supplementary Figure 4.** The influence of HIF2A upon FOXP3 expression and NSCLC cells stemness in vivo. (a) H460 cells stably transfected with scramble or HIF2A were respectively injected subcutaneously into nude mice. (b) The volumes of the tumours were measured every 3 days (\* $p < 0.05$ ). (c) WB analysis was conducted to evaluate the expression of HIF2A, FOXP3 and two CSC markers. (d) IHC analysis was conducted to evaluate the expression of HIF2A, FOXP3 and two CSC markers. The experiments were performed in triplicate at least.

**Supplementary Figure 4**

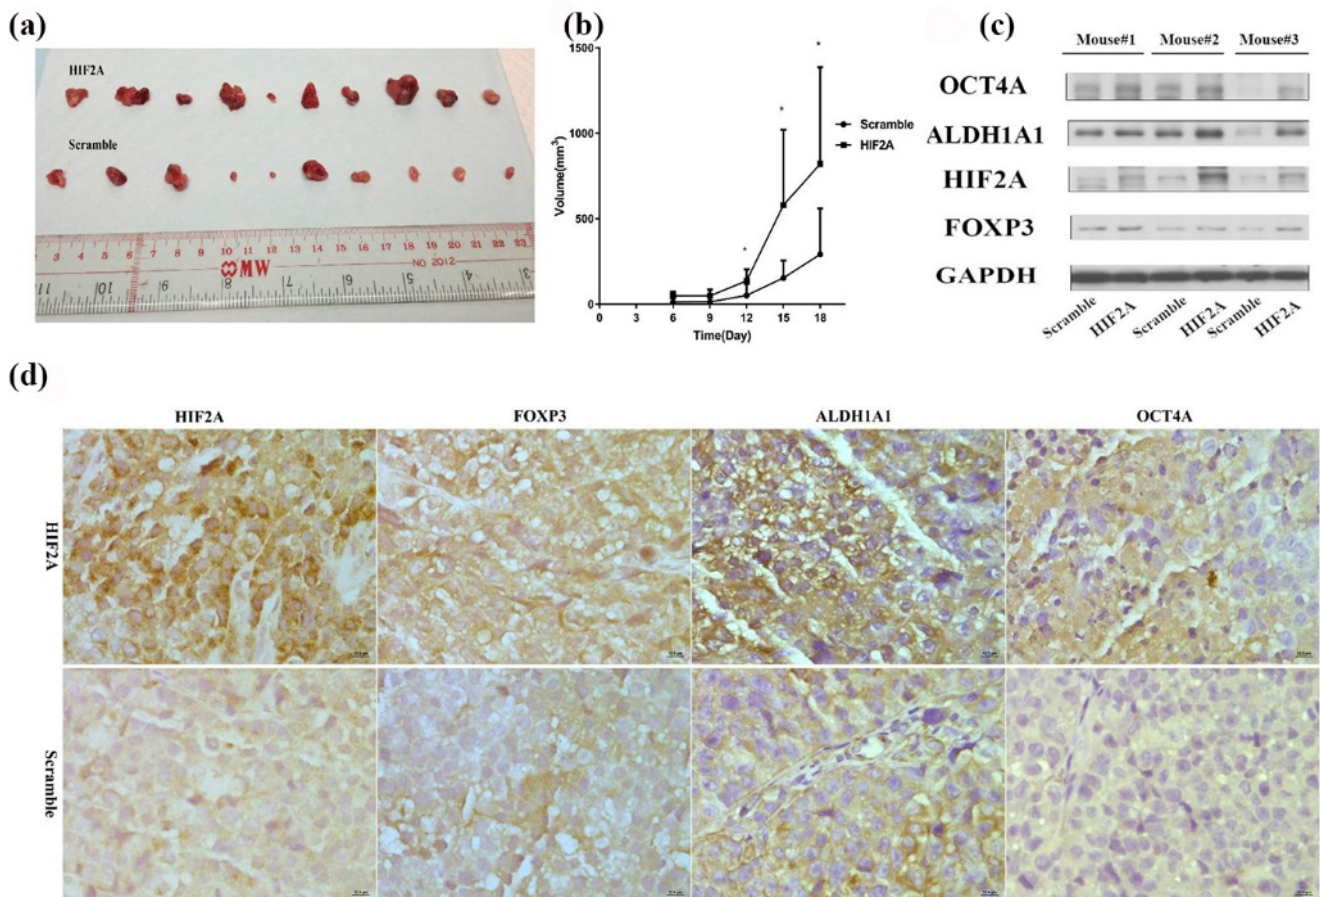

Supplement: Supplementary file 1 [file 15611900]
